# Supplementary material for: High antibody titres induced by protein subunit vaccines using Mycobacterium ulcerans antigens Hsp18 and MUL_3720 with a TLR-2 agonist fail to protect against Buruli ulcer in mice
Source: PeerJ. 2020 Aug 7;8:e9659. doi: 10.7717/peerj.9659 (PMC7416718; doi:10.7717/peerj.9659)
Supplement: Supplemental Information 5 [file peerj-08-9659-s005.docx]

Supplementary Table 5. *M. ulcerans* challenge survival outcomes in vaccinated C57BL/6 mice.

| **Vaccination group** | **# mice with ulcers at day 63 (n=7)** | **# mice with ulcers at day 68 (n=7)** | **# mice with ulcers at day 75 (n=7)** |
| --- | --- | --- | --- |
| MUL_3720 + R4Pam2Cys | 0 | 6 | 7 |
| Hsp18 + R4Pam2Cys | 2 | 7 | - |
| Mul_3720 alone | 0 | 5 | 7 |
| R4Pam2Cys alone  (without MUL_3720) | 0 | 7 | - |
| Hsp18 alone | 1 | 7 | - |
| R4Pam2Cys alone  (without Hsp18) | 0 | 5 | 7 |
| BCG | 6 | 6 | 7 |
